# Supplementary material for: The adapter importin-α provides flexible control of nuclear import at the expense of efficiency
Source: PubMed Central journal article supplement — Mol Syst Biol. 2007 Jun 5;3:118. doi: 10.1038/msb4100160 (PMC1911202; doi:10.1038/msb4100160), 2007-06-05
Supplement: msb4100160-s1.pdf [file msb4100160-s1.pdf]

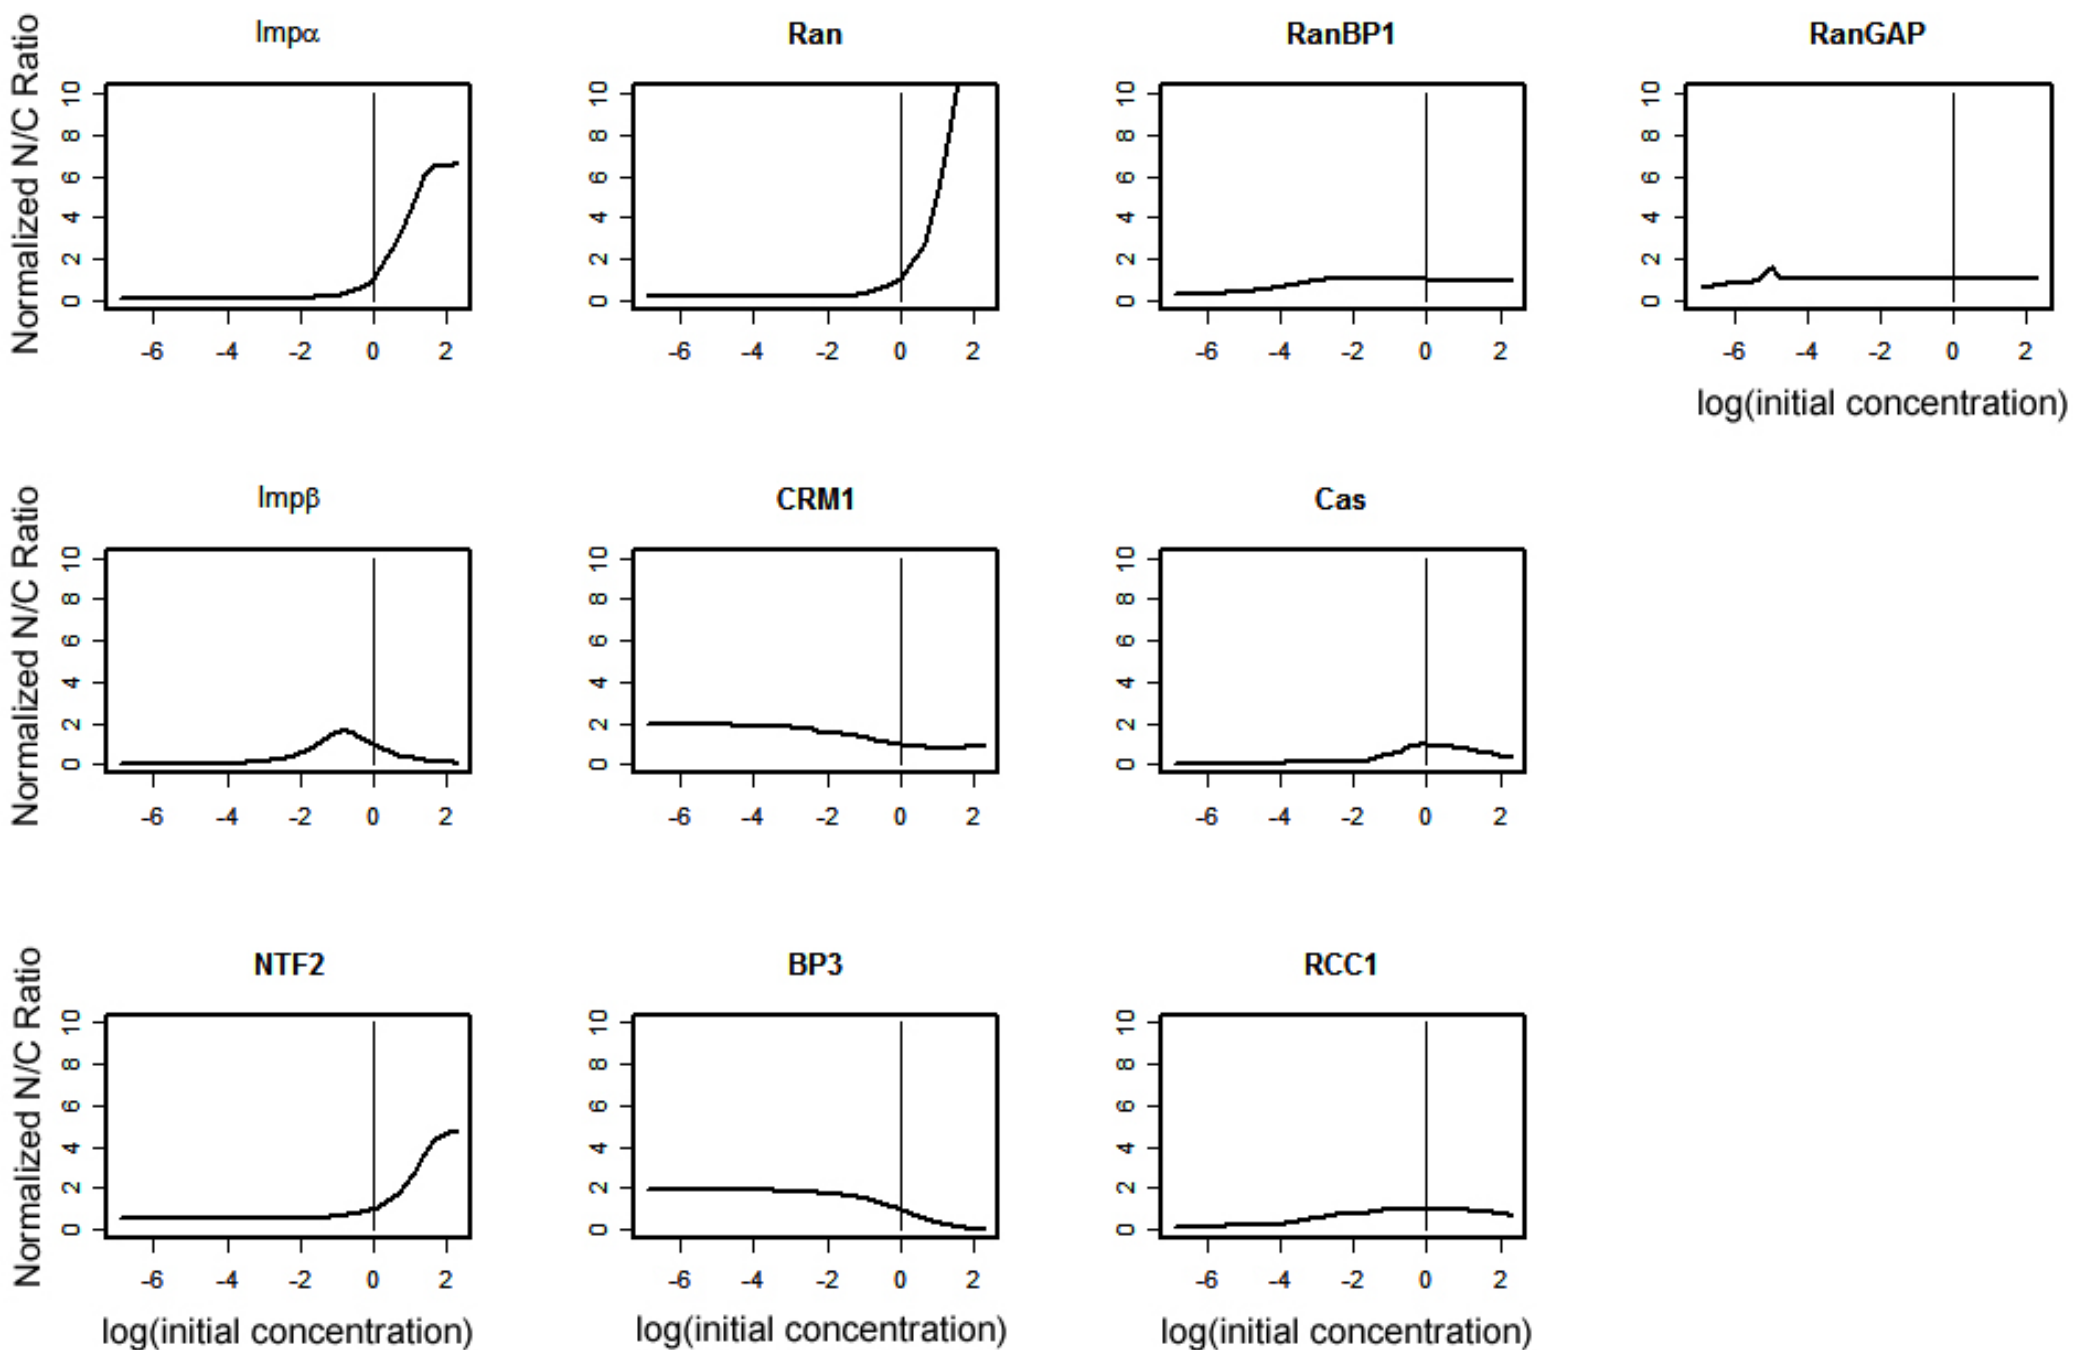

**Supplementary Figure 1** - Sensitivity analysis of the computer model. Concentrations of reactants in the model were varied individually over a 5-log scale and the model was run to steady-state conditions for each concentration change. Graphs are normalized so that (0,1) indicates the original value used in the model.
